# Supplementary material
Source: MDPI journal article supplement (https://www.mdpi.com/2313-0105/9/6/318)
Supplement: s1 [file s1]

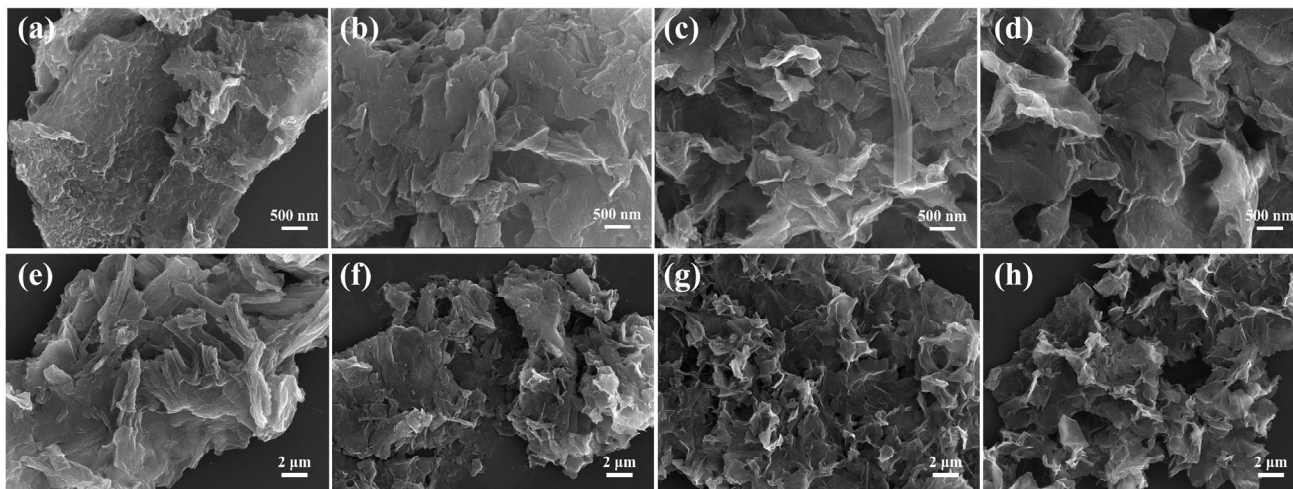

**Figure S1.** SEM images of (a,e) PDI-EDA, (b,f) PDI-EDA/EG-10, (c,g) PDI-EDA/EG-20, and (d,h) PDI-EDA/EG-30 composites, respectively.

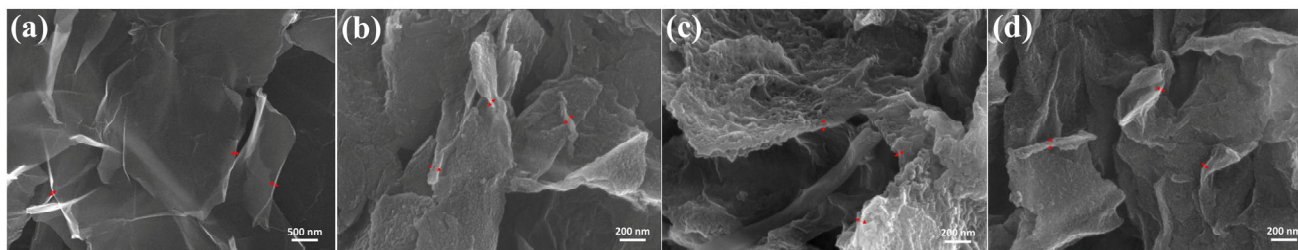

**Figure S2.** SEM images of (a) EG, (b) PDI-EDA/EG-10, (c) PDI-EDA/EG-20, and (d) PDI-EDA/EG-30 composites, respectively.

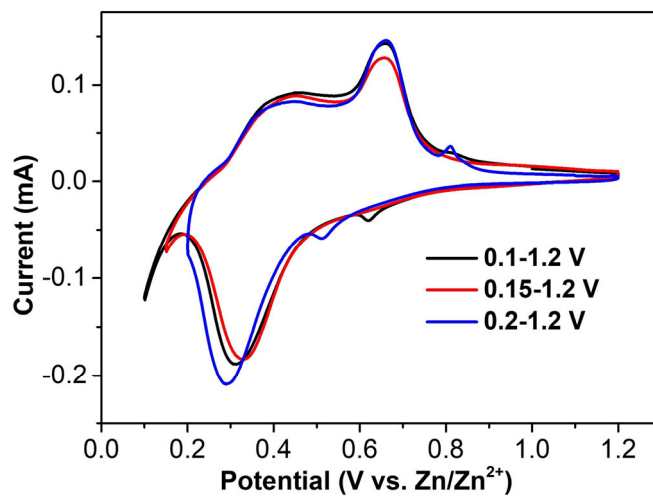

**Figure S3.** CV curves of the PDI-EDA/EG-20 electrode at different potential windows.

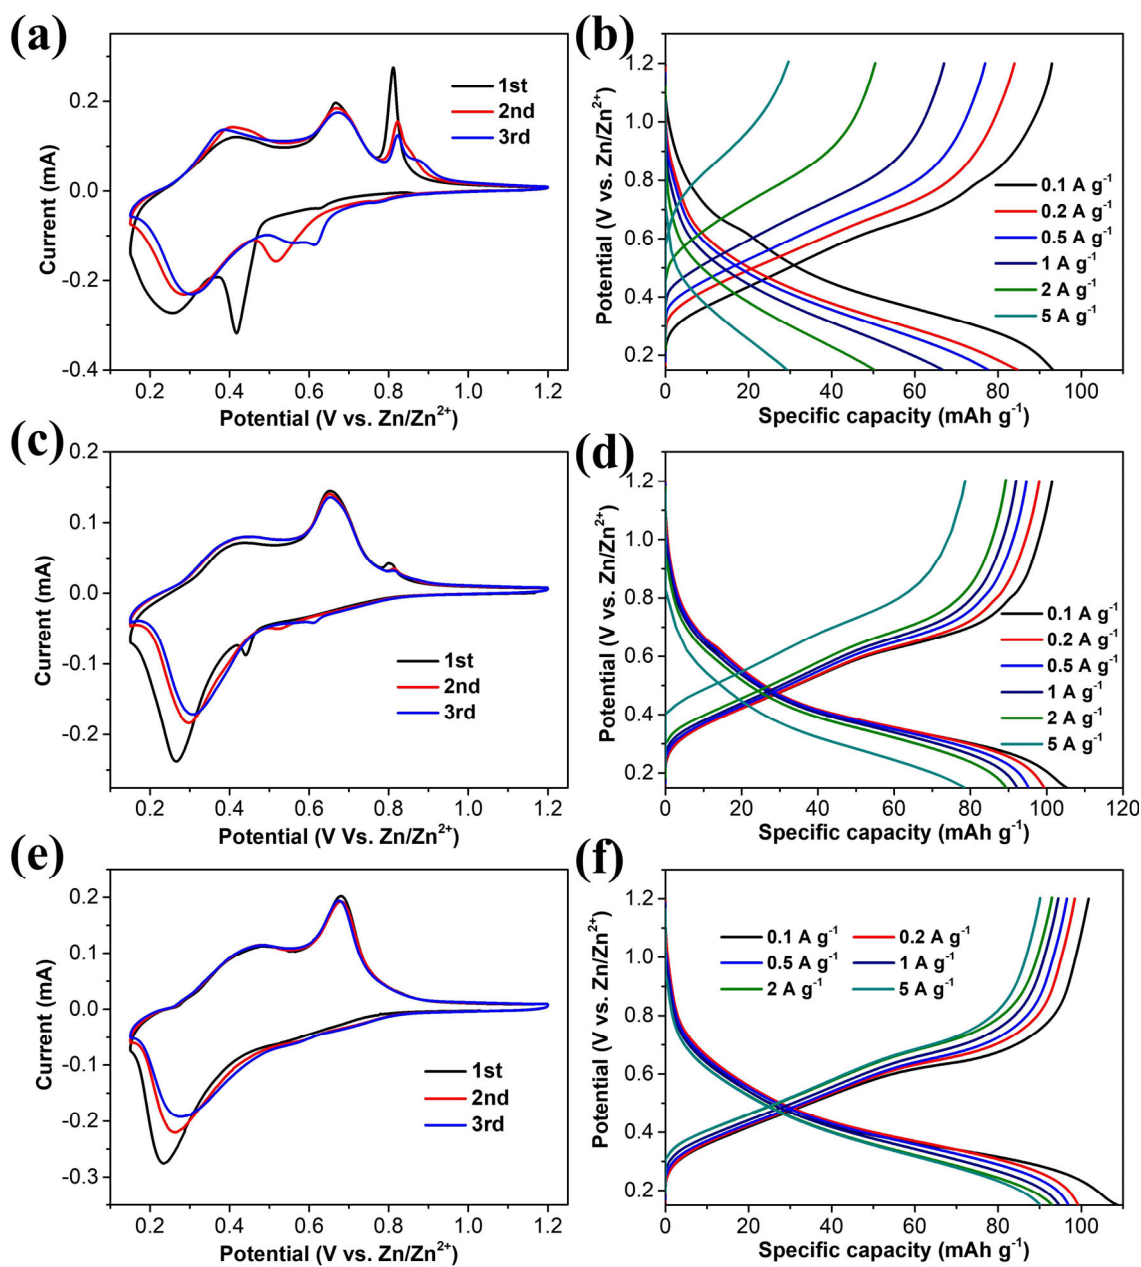

**Figure S4.** (a,c,e) CV curves and (b,d,f) GCD profiles of pure PDI-EDA, PDI-EDA/EG-10, and PDI-EDA/EG-20 electrodes, respectively.

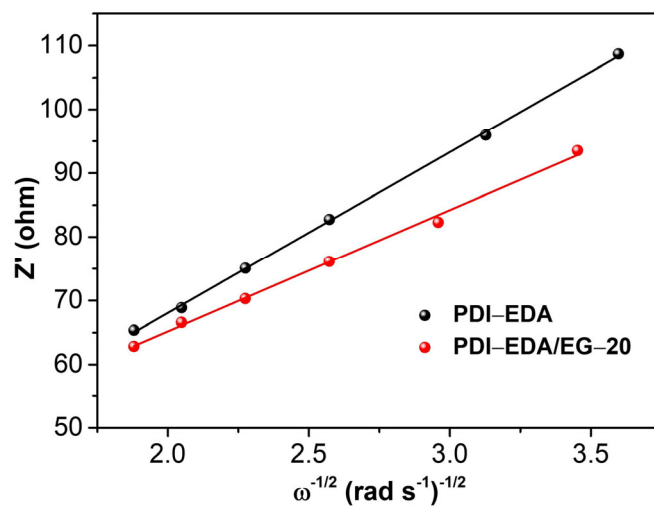

**Figure S5.** The relationship between  $Z'$  and  $\omega^{-1/2}$  for the PDI-EDA and PDI-EDA/EG-20 electrodes.

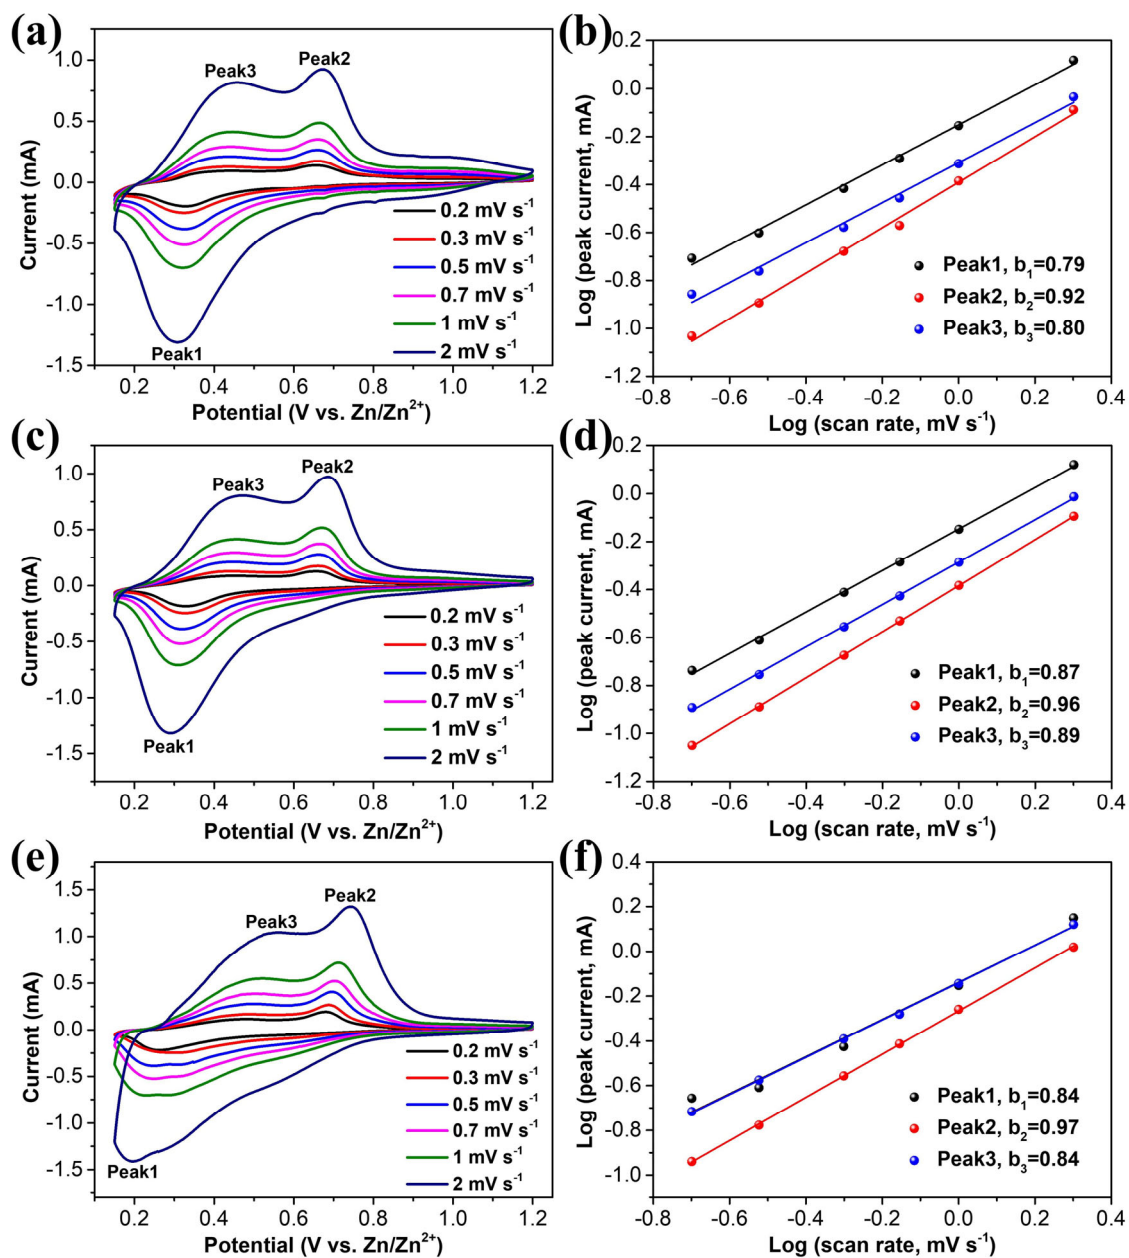

Figure S6. (a,c,e) CV curves at different current densities and (b,d,f) b values for anodic and cathodic peaks of PDI-EDA, PDI-EDA/EG-10, and PDI-EDA/EG-20 electrodes, respectively.

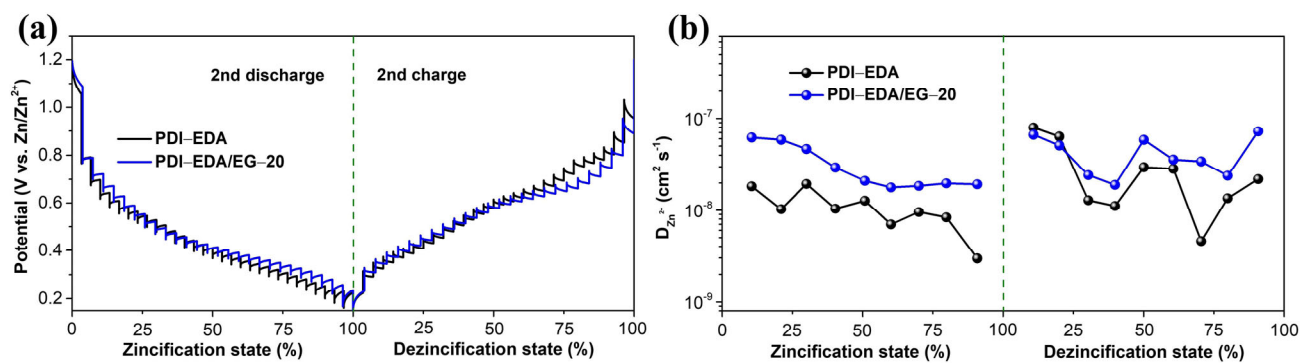

**Figure S7.** (a) GITT curves and (b) corresponding  $\text{Zn}^{2+}$  diffusion coefficients at different potential states.

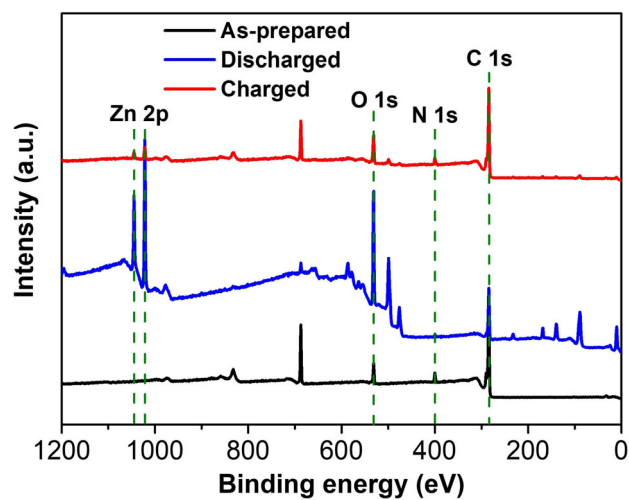

**Figure S8.** Typical XPS survey of the PDI-EDA/EG-20 electrode at different discharge/charge states.

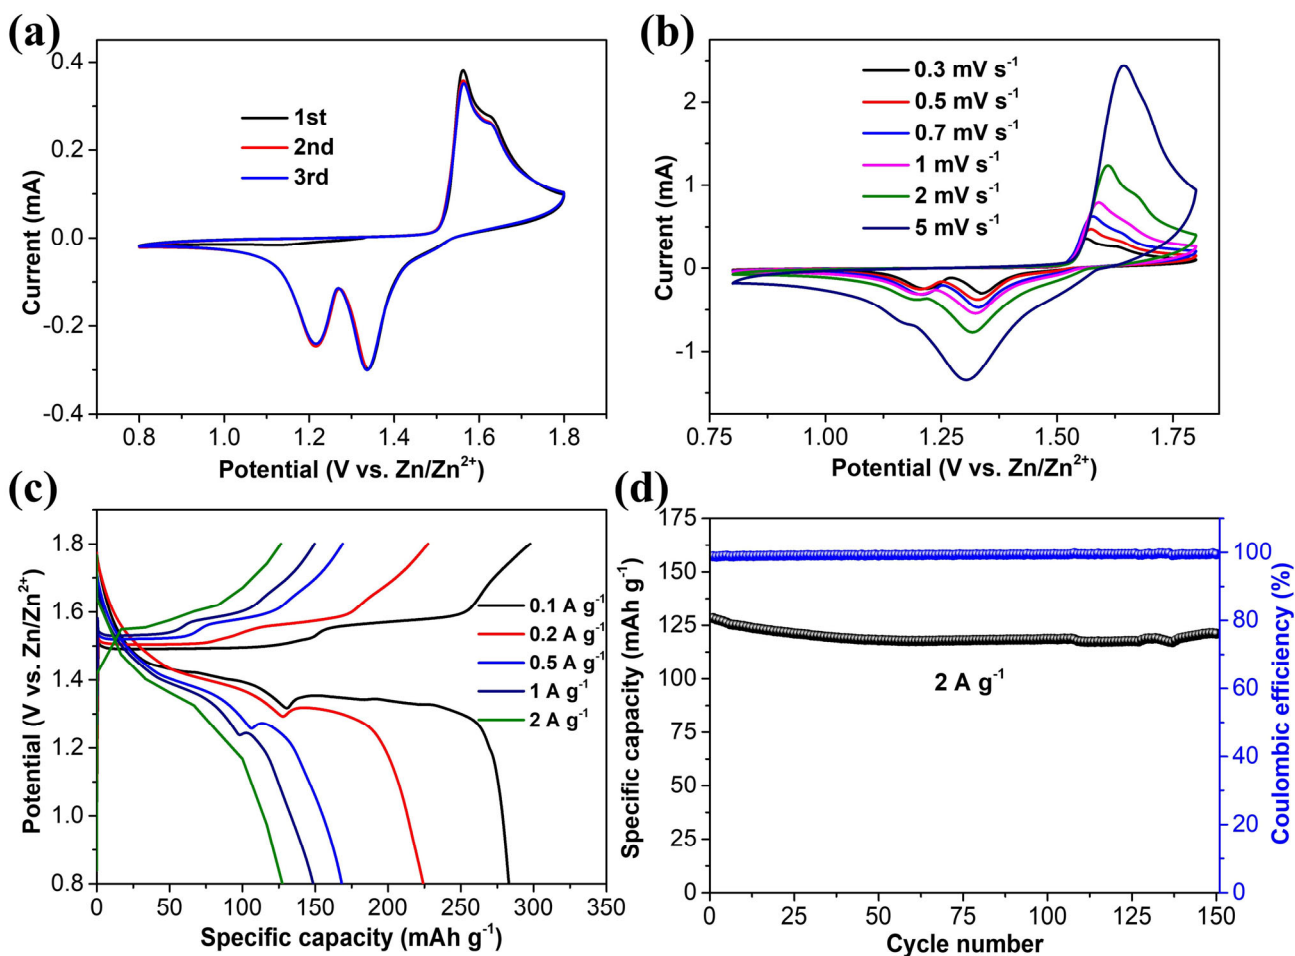

Figure S9. Electrochemical performance of the MnO<sub>2</sub> cathode. (a) Initial three CV curves. (b) CV curves at different sweep rates. (c) GCD profiles at different current densities. (d) Long-term cycling stability at 2 A g<sup>-1</sup>.

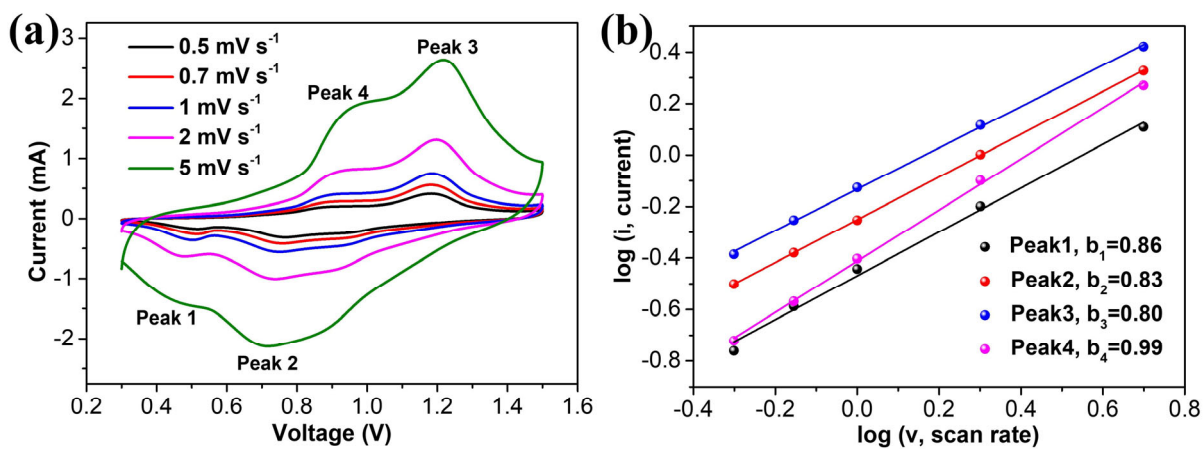

Figure S10. (a) CV curves of the device at different scan rates. (b)  $b$  values for cathodic and anodic peaks of the ZIB cell.



**Table S1.** Comparison of cycling performance of recently reported organic materials for ZIBs in the literature.

| Organic Material.        | Electrolyte                          | Cycle number                 | Capacity Retention | Ref.      |
|--------------------------|--------------------------------------|------------------------------|--------------------|-----------|
| PDI-EDA/EG               | 2 M ZnSO <sub>4</sub>                | 1000, 1 A g <sup>-1</sup>    | 93.4%              | This work |
| PTVE                     | 1 M ZnSO <sub>4</sub>                | 500, 1 A g <sup>-1</sup>     | 65%                | [1]       |
| BDB                      | 19 M LiTFSI+1 M Zn(OTF) <sub>2</sub> | 1000, 0.78 A g <sup>-1</sup> | 75%                | [2]       |
| PANI                     | 1 M Zn(OTF) <sub>2</sub>             | 3000, 5 A g <sup>-1</sup>    | 92%                | [3]       |
| PT                       | 1 M Zn(OTF) <sub>2</sub>             | 550, 0.1 A g <sup>-1</sup>   | 61.86%             | [4]       |
| C4Q                      | 3 M Zn(OTF) <sub>2</sub>             | 1000, 0.5 A g <sup>-1</sup>  | 87%                | [5]       |
| PTO                      | 2 M ZnSO <sub>4</sub>                | 1000, 3 A g <sup>-1</sup>    | 70%                | [6]       |
| CMP                      | 2 M ZnCl <sub>2</sub>                | 1000, 6 A g <sup>-1</sup>    | 87.6%              | [7]       |
| poly(1,5-NAPD)/Poly(pAP) | 2 M ZnSO <sub>4</sub>                | 5000, 5 A g <sup>-1</sup>    | 88%                | [8]       |
| PTA-026                  | 3 M ZnSO <sub>4</sub>                | 200, 0.8 A g <sup>-1</sup>   | 92.2%              | [9]       |
| BQPH                     | 2 M ZnSO <sub>4</sub>                | 1000, 10 A g <sup>-1</sup>   | 82%                | [10]      |

## References

1. Luo, Y.; Zheng, F.; Liu, L.; Lei, K.; Hou, X.; Xu, G.; Meng, H.; Shi, J.; Li, F. A High-Power Aqueous Zinc-Organic Radical Battery with Tunable Operating Voltage Triggered by Selected Anions. *ChemSusChem* **2020**, *13*, 2239–2244.
2. Glatz, H.; Lizundia, E.; Pacifico, F.; Kundu, D. An Organic Cathode Based Dual-Ion Aqueous Zinc Battery Enabled by a Cellulose Membrane. *ACS Appl. Energ. Mater.* **2019**, *2*, 1288–1294.
3. Wan, F.; Zhang, L.; Wang, X.; Bi, S.; Niu, Z.; Chen, J. An Aqueous Rechargeable Zinc-Organic Battery with Hybrid Mechanism. *Adv. Funct. Mater.* **2018**, *28*, 1804975.
4. Wu, M.; Su, W.; Wang, X.; Liu, Z.; Zhang, F.; Luo, Z.; Yang, A.; Yeleken, P.; Miao, Z.; Huang, Y. Long-Life Aqueous Zinc-Organic Batteries with a Trimethyl Phosphate Electrolyte and Organic Cathode. *ACS Sustain. Chem. Eng.* **2023**, *11*, 957–964.
5. Zhao, Q.; Huang, W.; Luo, Z.; Liu, L.; Lu, Y.; Li, Y.; Li, L.; Hu, J.; Ma, H.; Chen, J. High-capacity aqueous zinc batteries using sustainable quinone electrodes. *Sci. Adv.* **2018**, *4*, eaao1761.
6. Guo, Z.; Ma, Y.; Dong, X.; Huang, J.; Wang, Y.; Xia, Y. An Environmentally Friendly and Flexible Aqueous Zinc Battery Using an Organic Cathode. *Angew. Chem. Int. Ed.* **2018**, *130*, 11911–11915.
7. Zhang, H.; Zhong, L.; Xie, J.; Yang, F.; Liu, X.; Lu, X. A COF-Like N-Rich Conjugated Microporous Polytriphenylamine Cathode with Pseudocapacitive Anion Storage Behavior for High-Energy Aqueous Zinc Dual-Ion Batteries. *Adv. Mater.* **2021**, *33*, 2101857.
8. Zhao, Y.; Huang, Y.; Wu, F.; Chen, R.; Li, L. High-Performance Aqueous Zinc Batteries Based on Organic/Organic Cathodes Integrating Multiredox Centers. *Adv. Mater.* **2021**, *33*, 2106469.
9. Wang, X.; Wang, G.; He, X. Anthraquinone porous polymers with different linking patterns for high performance Zinc-Organic battery. *J. Colloid Interf. Sci.* **2023**, *629*, 434–444.
10. Tie, Z.; Zhang, Y.; Zhu, J.; Bi, S.; Niu, Z. An Air-Rechargeable Zn/Organic Battery with Proton Storage. *J. Am. Chem. Soc.* **2022**, *144*, 10301–10308.
